# Supplementary material for: Exploration of semiconducting properties of Zn(ii)- and Cd(ii)-based coordination polymers with dicarboxylate of a chair-type backbone
Source: Royal Society of Chemistry journal article supplement (doi:10.1039/d1ce01197a), 2021-01-01
Supplement: d1ce01197a1.pdf [file d1ce01197a1.pdf]

# Exploration of semiconducting properties of Zn(II) and Cd(II) based coordination polymers with dicarboxylate of chair-type backbone

Akhtaruzzaman,<sup>a</sup> Baishakhi Pal,<sup>b</sup> Samim Khan,<sup>a</sup> Basudeb Dutta,<sup>a</sup> Sanobar Naaz,<sup>a</sup> Suwendu Maity,<sup>c</sup>  
Prasanta Ghosh,<sup>d</sup> Partha Pratim Ray\*<sup>b</sup> and Mohammad Hedayetullah Mir\*<sup>a</sup>

<sup>a</sup>Department of Chemistry, Aliah University, New Town, Kolkata 700 156, India.

E-mail: [chmmir@gmail.com](mailto:chmmir@gmail.com)

<sup>b</sup>Department of Physics, Jadavpur University, Jadavpur, Kolkata 700 032, India.

E-mail: [partha@phys.jdvu.ac.in](mailto:partha@phys.jdvu.ac.in)

<sup>c</sup>Department of Chemistry, Jadavpur University, Jadavpur, Kolkata 700 032, India

<sup>d</sup>Department of Chemistry, R. K. M. Residential College, Narendrapur, Kolkata 700103, India

To whom correspondence should be addressed. E-mail: [partha@phys.jdvu.ac.in](mailto:partha@phys.jdvu.ac.in);  
[chmmir@gmail.com](mailto:chmmir@gmail.com)

## Supporting Information

**Table S1.** Crystal data and refinement parameters for CP 1

|                                                                                |                                                                                |
|--------------------------------------------------------------------------------|--------------------------------------------------------------------------------|
| Formula                                                                        | C <sub>40</sub> H <sub>42</sub> Cd <sub>2</sub> N <sub>4</sub> O <sub>13</sub> |
| Fw                                                                             | 1011.60                                                                        |
| crystalsyst                                                                    | Triclinic                                                                      |
| space group                                                                    | <i>P</i> $\bar{1}$                                                             |
| <i>a</i> (Å)                                                                   | 11.7888(4)                                                                     |
| <i>b</i> (Å)                                                                   | 13.2584(4)                                                                     |
| <i>c</i> (Å)                                                                   | 14.3334(5)                                                                     |
| $\alpha$ (deg)                                                                 | 88.695(1)                                                                      |
| $\beta$ (deg)                                                                  | 66.249(1)                                                                      |
| $\gamma$ (deg)                                                                 | 89.327(1)                                                                      |
| <i>V</i> (Å <sup>3</sup> )                                                     | 2050.03(12)                                                                    |
| <i>Z</i>                                                                       | 2                                                                              |
| <i>D</i> <sub>calcd</sub> (g/cm <sup>3</sup> )                                 | 1.639                                                                          |
| $\mu$ (mm <sup>-1</sup> )                                                      | 1.107                                                                          |
| $\lambda$ (Å)                                                                  | 0.0713                                                                         |
| GOF on <i>F</i> <sup>2</sup>                                                   | 1.112                                                                          |
| data[ <i>I</i> > 2 $\sigma$ ( <i>I</i> )]/params                               | 3506/226                                                                       |
| final <i>R</i> indices<br>[ <i>I</i> > 2 $\sigma$ ( <i>I</i> )] <sup>a,b</sup> | <i>R</i> 1 = 0.0361<br><i>wR</i> 2 = 0.1238                                    |

$${}^a R1 = \frac{\sum ||F_o| - |F_c||}{\sum |F_o|}, {}^b wR2 = \frac{[\sum w(F_o^2 - F_c^2)^2 / \sum w(F_o^2)^2]}{1/2}$$

**Table S2.** Selected bond lengths and bond angles in CP 1

| Bond lengths (Å) |          | Bond angles (°)    |            |                     |            |
|------------------|----------|--------------------|------------|---------------------|------------|
| Cd(01)-O(3)      | 2.298(3) | O(3)-Cd(01)-O(4)   | 54.32(9)   | O(1)-Cd(02)-O(2)    | 53.00(11)  |
| Cd(01)-O(4)      | 2.473(3) | O(3)-Cd(01)-O(8)   | 110.57(11) | O(1)-Cd(02)-N(3)    | 139.38(13) |
| Cd(01)-O(8)      | 2.330(3) | O(3)-Cd(01)-N(1)   | 163.64(13) | O(1)-Cd(02)-N(4)    | 98.68(12)  |
| Cd(01)-N(1)      | 2.355(4) | O(3)-Cd(01)-N(2)   | 94.67(13)  | O(1)-Cd(02)-O(1)a   | 71.40(10)  |
| Cd(01)-N(2)      | 2.346(4) | O(3)-Cd(01)-C(33)  | 27.13(11)  | O(1)-Cd(02)-O(5)c   | 87.66(10)  |
| Cd(01)-O(7)b     | 2.524(3) | O(3)-Cd(01)-O(7)b  | 88.22(9)   | O(1)-Cd(02)-O(6)c   | 123.42(12) |
| Cd(01)-O(8)b     | 2.361(3) | O(3)-Cd(01)-C(8)b  | 86.19(10)  | O(1)-Cd(02)-C(30)c  | 106.28(11) |
| Cd(02)-O(1)      | 2.335(3) | O(4)-Cd(01)-O(8)   | 84.29(11)  | O(2)-Cd(02)-N(3)    | 86.89(12)  |
| Cd(02)-O(2)      | 2.532(3) | O(4)-Cd(01)-N(1)   | 129.16(11) | O(2)-Cd(02)-N(4)    | 88.27(12)  |
| Cd(02)-N(3)      | 2.363(4) | O(4)-Cd(01)-N(2)   | 85.95(13)  | O(1)a-Cd(02)-O(2)   | 121.78(9)  |
| Cd(02)-N(4)      | 2.340(3) | O(4)-Cd(01)-C(33)  | 27.20(11)  | O(2)-Cd(02)-O(5)c   | 84.36(10)  |
| Cd(02)-O(1)a     | 2.380(3) | O(4)-Cd(01)-O(7)b  | 141.79(10) | O(2)-Cd(02)-O(6)c   | 138.08(9)  |
| Cd(02)-O(5)c     | 2.335(3) | O(4)-Cd(01)-C(08)b | 122.69(10) | O(2)-Cd(02)-C(30)c  | 111.40(11) |
| Cd(02)-O(6)c     | 2.423(3) | O(8)-Cd(01)-N(1)   | 85.73(12)  | N(3)-Cd(02)-N(4)    | 70.83(11)  |
|                  |          | O(8)-Cd(01)-N(2)   | 139.72(12) | O(1)a-Cd(02)-N(3)   | 141.48(11) |
|                  |          | O(8)-Cd(01)-C(33)  | 97.86(12)  | O(5)c-Cd(02)-N(3)   | 95.23(11)  |
|                  |          | O(7)b-Cd(01)-O(8)  | 120.17(11) | O(6)c-Cd(02)-N(3)   | 89.49(12)  |
|                  |          | O(8)-Cd(01)-O(8)b  | 72.01(9)   | N(3)-Cd(02)-C(30)c  | 93.19(11)  |
|                  |          | N(1)-Cd(01)-N(2)   | 70.80(14)  | O(1)a-Cd(02)-N(4)   | 83.89(11)  |
|                  |          | N(1)-Cd(01)-C(33)  | 153.62(13) | O(5)c-Cd(02)-N(4)   | 164.61(12) |
|                  |          | O(7)b-Cd(01)-N(1)  | 84.53(11)  | O(6)c-Cd(02)-N(4)   | 129.46(12) |
|                  |          | O(8)b-Cd(01)-N(1)  | 100.81(12) | N(4)-Cd(02)-C(30)c  | 154.35(12) |
|                  |          | N(2)-Cd(01)-C(33)  | 90.68(14)  | O(1)a-Cd(02)-O(5)c  | 111.47(12) |
|                  |          | O(7)b-Cd(01)-N(2)  | 90.43(13)  | O(1)a-Cd(02)-O(6)c  | 84.61(10)  |
|                  |          | O(8)b-Cd(01)-N(2)  | 142.91(12) | O(1)a-Cd(02)-C(30)c | 98.31(11)  |
|                  |          | O(7)b-Cd(01)-C(33) | 115.11(11) | O(5)c-Cd(02)-O(6)c  | 54.41(9)   |
|                  |          | O(8)b-Cd(01)-C(33) | 105.17(11) | O(5)c-Cd(02)-C(30)c | 27.24(11)  |
|                  |          | O(7)b-Cd(01)-O(8)b | 52.50(10)  | O(6)c-Cd(02)-C(30)c | 27.18(11)  |

Symmetry transformations: a = 1-x,1-y,2-z; b = 2-x,-y,1-z; c = 2-x,1-y,1-z

**Table S3.** Hydrogen bonding in CP **1**

| D—H···A        | Distance (Å)<br>D—H | Distance (Å) H···A | Distance (Å) D···A | Angle (°)<br>$\angle$ D—H···A | Symmetry            |
|----------------|---------------------|--------------------|--------------------|-------------------------------|---------------------|
| O10—H10A···O9  | 0.8500              | 1.9300             | 2.711(10)          | 152.00                        | -                   |
| O10—H10B···O11 | 0.8500              | 2.0000             | 2.787(8)           | 154.00                        | -                   |
| O12—H12A···O4  | 0.86(3)             | 1.97(4)            | 2.799(5)           | 161(7)                        | -                   |
| O12—H12B···O5  | 0.85(8)             | 2.36(7)            | 2.794(5)           | 113(6)                        | $c = 2-x, 1-y, 1-z$ |
| O13—H13A···O3  | 0.8500              | 1.9500             | 2.729(6)           | 152.00                        | $v = x, 1+y, z$     |
| O13—H13B···O6  | 0.8500              | 1.9200             | 2.763(6)           | 171.00                        | $c = 2-x, 1-y, 1-z$ |

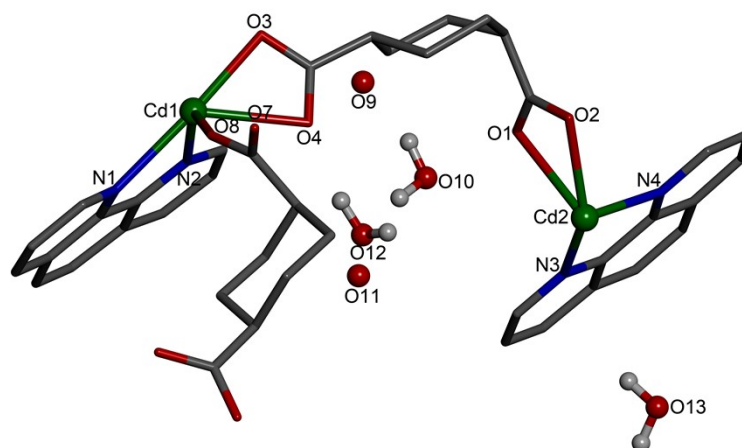

**Fig. S1** Asymmetric unit of compound **1**.

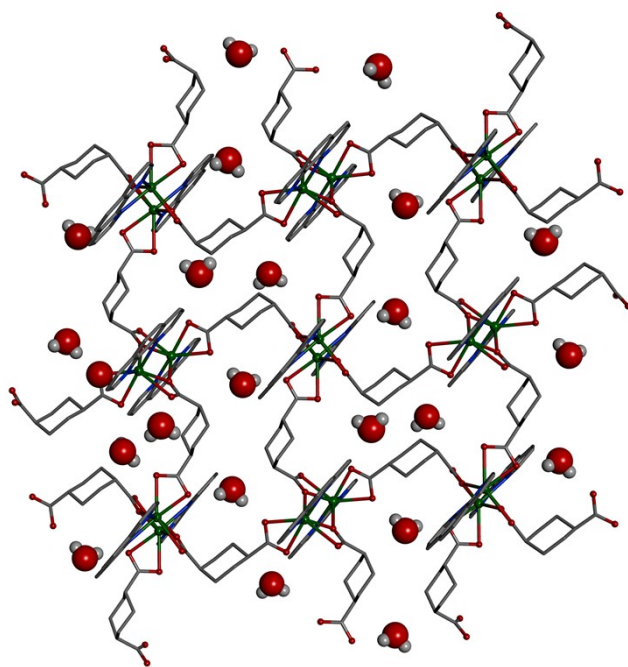

**Fig. S2** 2D sheet formed in CP **1** showing water molecules in the cavity.

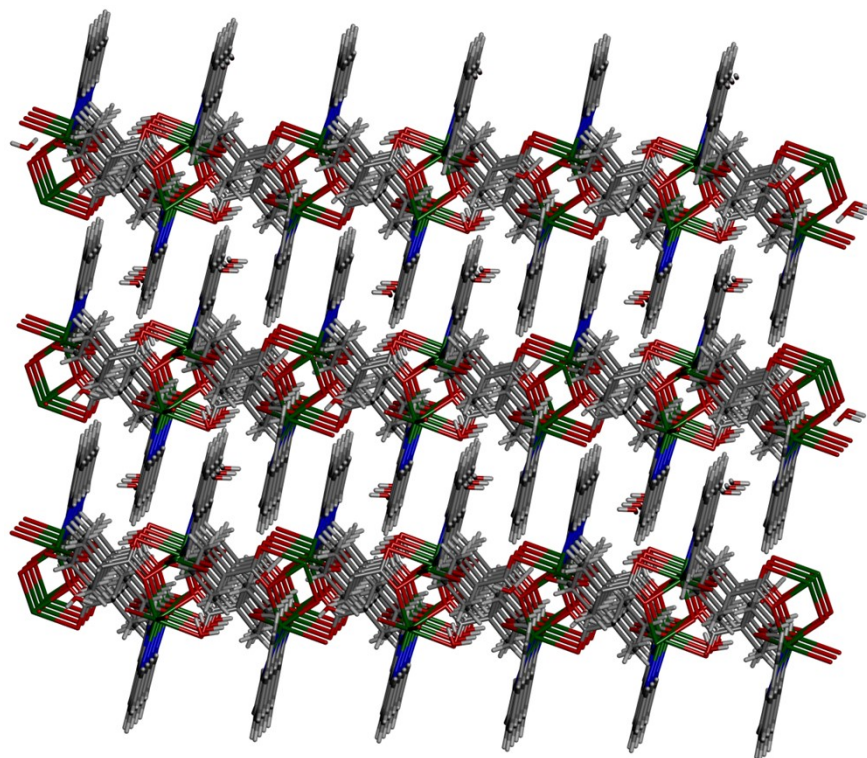

**Fig. S3** Intermolecular hydrogen bonding leading to 3D network formation in **1**.

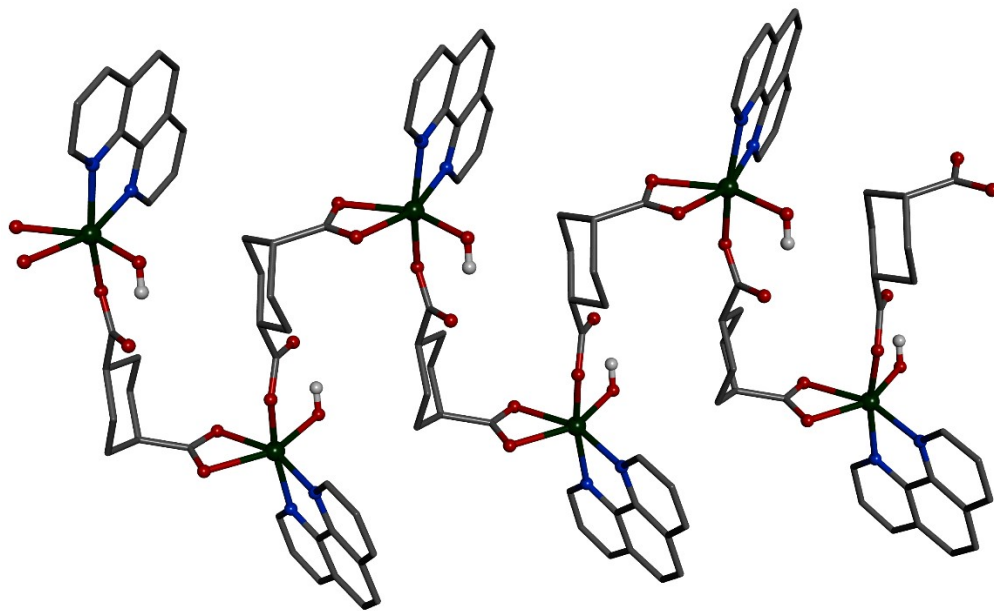

**Fig. S4** Formation of 1D chain in **2**.

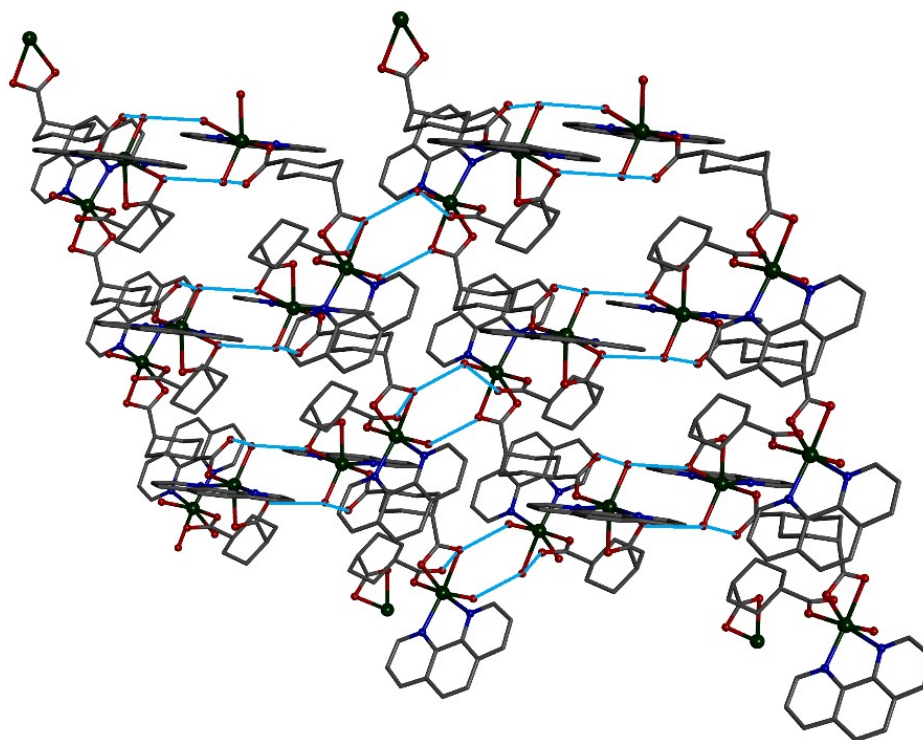

**Fig. S5** Intermolecular hydrogen bonding leading to 2D sheet formation in **2**.

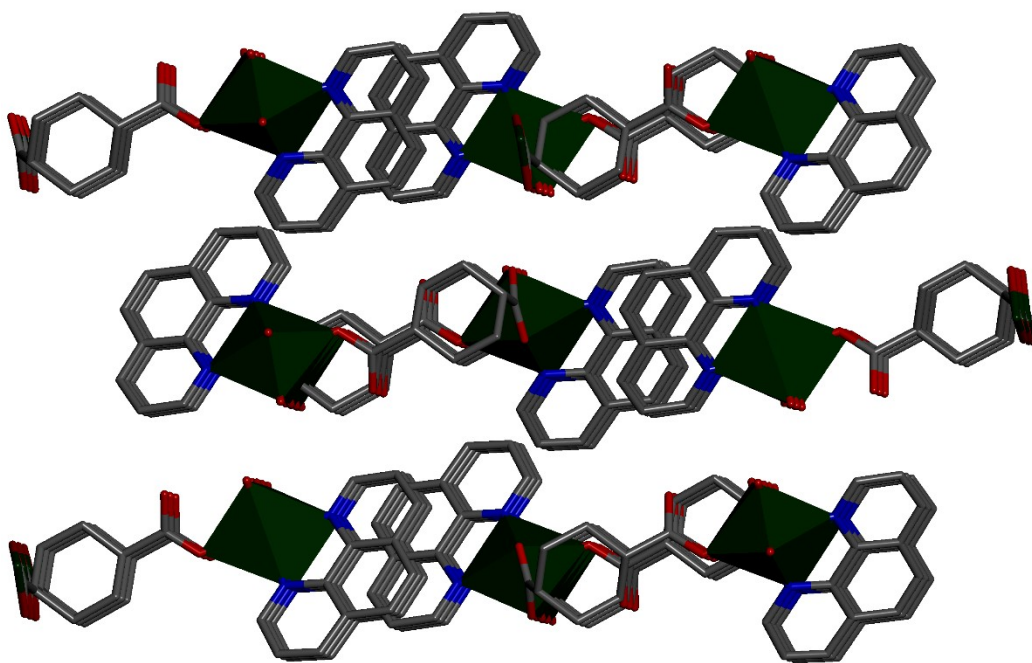

Fig. S6 Formation of 3D network CP 2.

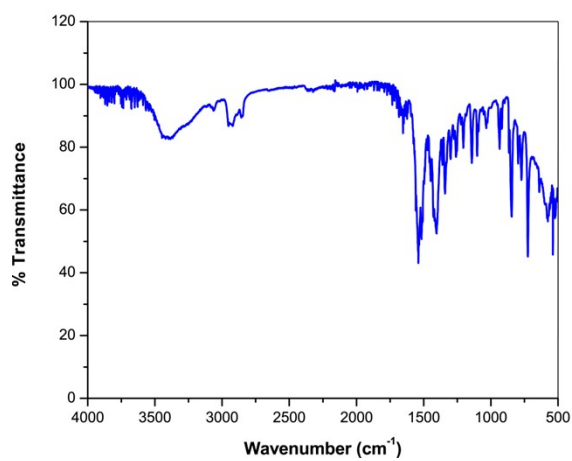

(a)

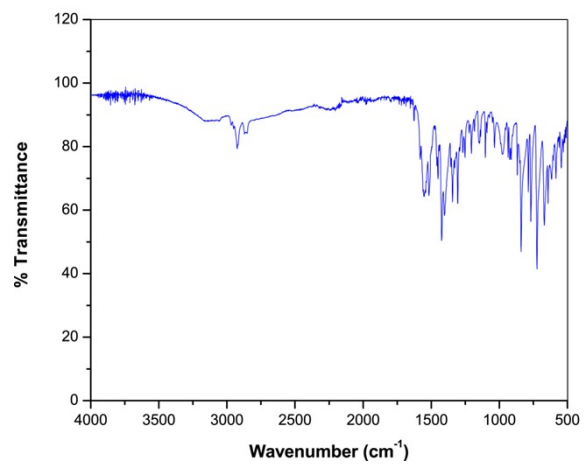

(b)

Fig. S7 IR spectrum of (a) CP 1 and (b) CP 2.

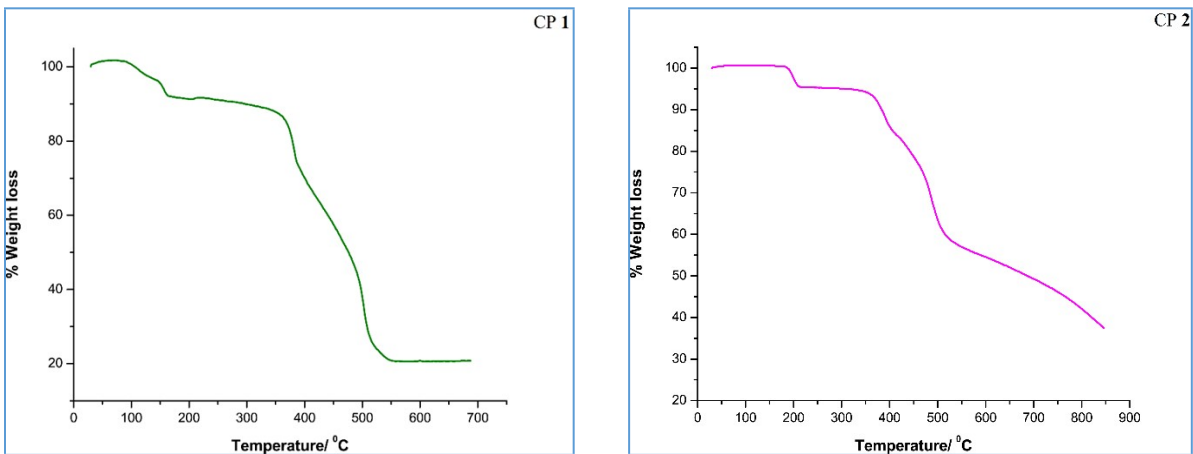

**Fig. S8** TGA of CP 1 (left) and CP 2 (right).

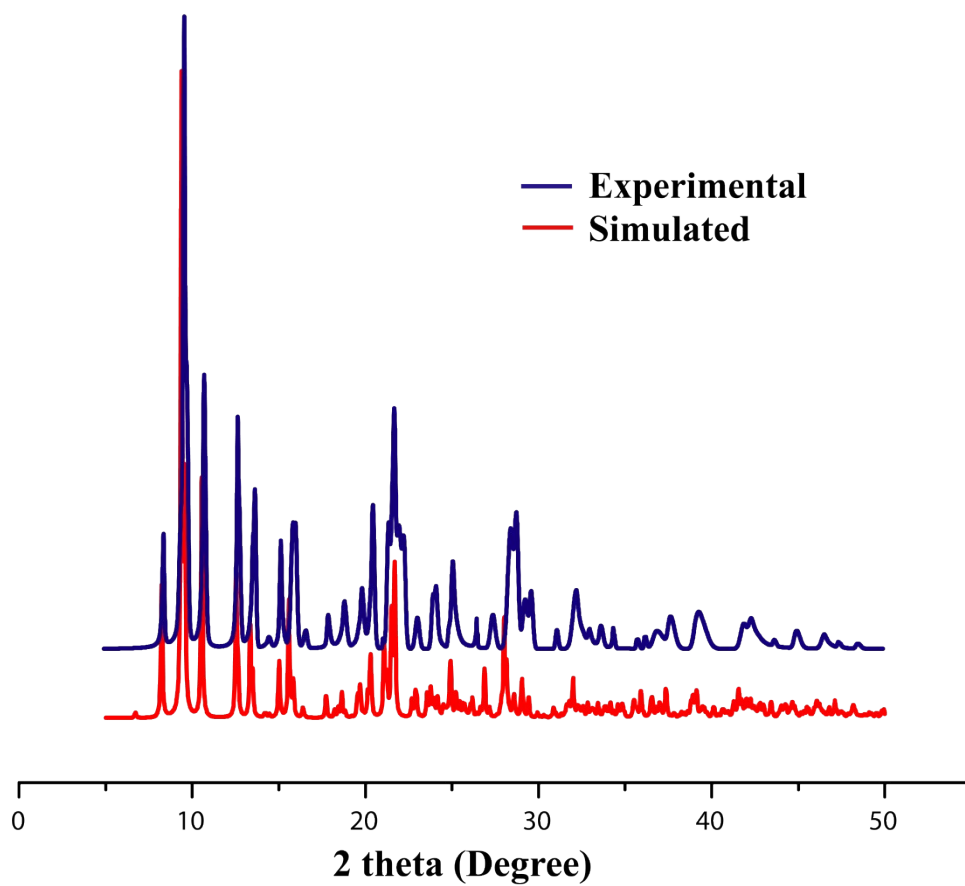

**Fig. 9** PXRD patterns of CP 1.



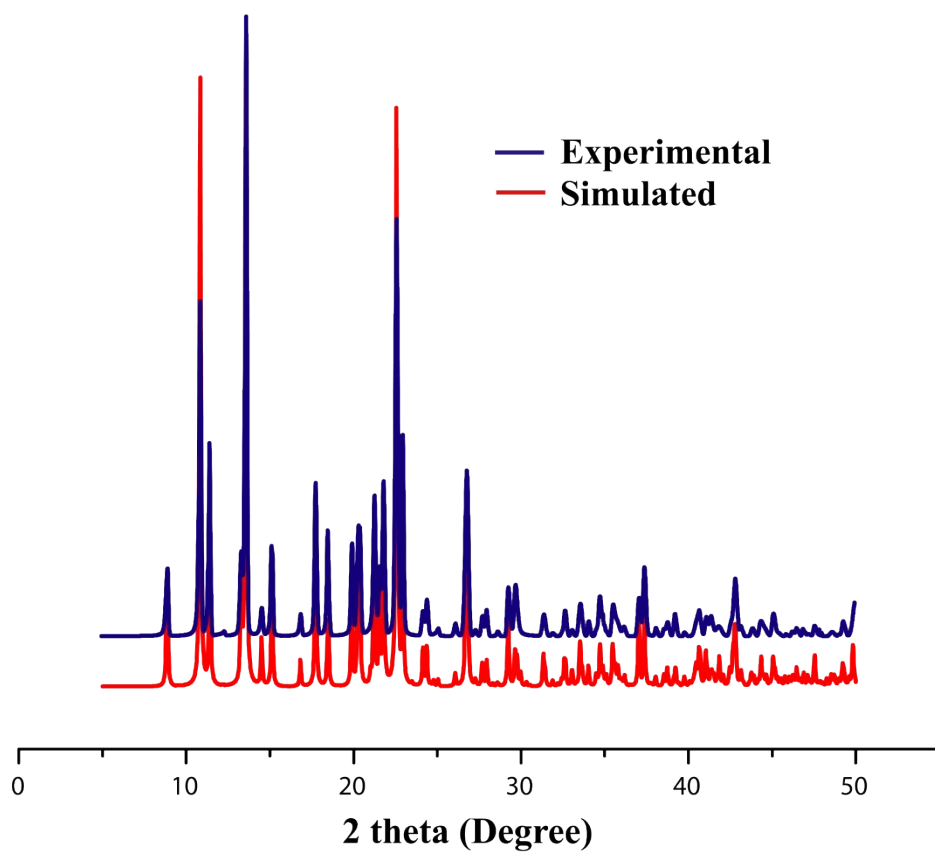

**Fig. 10** PXR D patterns of CP 2.

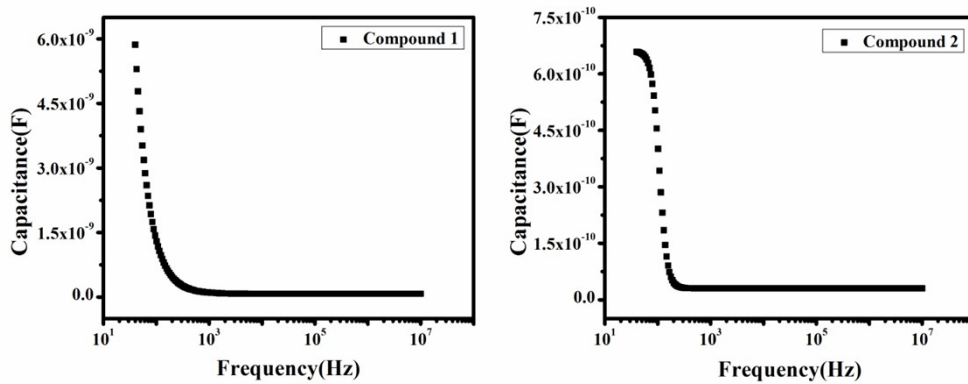

**Fig. S11** Capacitance *versus* frequency plot of (a) CP 1 and (b) CP 2.
